# Supplementary material for: Co-MOF@MWCNTs/GCE for the sensitive detection of TBHQ in food samples
Source: Royal Society of Chemistry journal article supplement (doi:10.1039/d3dt03158f), 2023-01-01
Supplement: d3dt03158f1.pdf [file d3dt03158f1.pdf]

## Supplementary Material

### Co-MOF@MWCNTs/GCE for the the sensitive detection of TBHQ in food samples

Junhui Feng <sup>a</sup>, Chenxin Li <sup>b</sup>, Wan-nai-yi Liu <sup>a</sup>, Xiaoqin Min <sup>a</sup>, Xiaoyun Lin <sup>a,\*</sup>

<sup>a</sup> School of Chemistry and Chemical Engineering, Nanchang University, Nanchang 330031, China

<sup>b</sup> School of Infrastructure Engineering, Nanchang University, Nanchang 330031, China

#### 1. Effect of drop casting amount

Fig. S1. (A) The DPV response of 100  $\mu$ M TBHQ at different modification amounts of Co-MOF@MWCNTs electrodes; (B) The relationship between the oxidation peak current of TBHQ and drop casting amount of the Co-MOF@MWCNTs.

Fig. S1A and B showed the relationship between the amount of Co-MOF@MWCNTs modification and the peak current. As shown in Fig. S1A and B, the peak current increases with the increase of the amount of Co-MOF@MWCNTs modification. When the material modification amount is 5  $\mu$ L, the peak current reaches the maximum, and then decreases gradually. This is because the effective working area of the modified electrode also increases with the initial amount of Co-MOF@MWCNTs, and when the amount of dressing is too large, the large amount of material covering on the electrode surface hinders electron transfer. Therefore, 5  $\mu$ L Co-MOF@MWCNTs material was selected as the best drop casting amount.

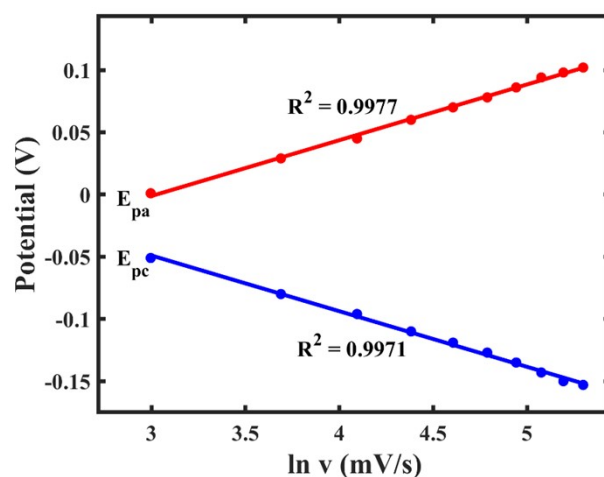

1  
2 **Fig. S2.** Plot of the peak potential ( $E_{pa}$  and  $E_{pc}$ ) versus the natural logarithm of scan rates ( $\ln v$ ).

3  
4 **Fig. S3.** DPV curves of TBHQ at the Co-MOF@MWCNTs: (A) Anti-interference, (B) Repeatability,  
5 (C) Reproducibility analysis, and (D) stability analysis for 30 days.
